# Supplementary material for: Structural properties of methanol–water binary mixtures within the quantum cluster equilibrium model
Source: Royal Society of Chemistry journal article supplement (doi:10.1039/c4cp05836d), 2015-01-01

**Supporting Information for**

**Structural properties of methanol - water binary mixtures within the quantum cluster  
equilibrium model**

G. Matisz<sup>a,b</sup>, A.-M. Kelterer<sup>c\*</sup>, W.M.F. Fabian<sup>d</sup> and S. Kunsági-Máté<sup>a,b</sup>

<sup>a</sup>*Department of General and Physical Chemistry, University of Pécs, Ifjúság 6, H-7624 Pécs,  
Hungary*

<sup>b</sup>*János Szentágothai Research Center, Ifjúság 20, H-7624 Pécs, Hungary*

<sup>c</sup>*Institute of Physical and Theoretical Chemistry, Graz University of Technology, NAWI Graz,  
Stremayrgasse 9/I, A-8010 Graz, Austria*

<sup>d</sup>*Institute of Chemistry, University of Graz, NAWI Graz, Heinrichstr. 28, A-8010 Graz, Austria*

**Table S1** The  $a_{mf}$  -  $b_{xv}$  parameter pairs for the methanol – water binary mixture with inclusion of cubic  $c8$  clusters.

| x(MeOH) | B3LYP-D3                                  |          |                                                       | M06-2X                                    |          |                                                       |
|---------|-------------------------------------------|----------|-------------------------------------------------------|-------------------------------------------|----------|-------------------------------------------------------|
|         | $a_{mf}/$<br>$\text{Jm}^3\text{mol}^{-1}$ | $b_{xv}$ | MAE <sup>a</sup> / $\text{dm}^3$<br>$\text{mol}^{-1}$ | $a_{mf}/$<br>$\text{Jm}^3\text{mol}^{-1}$ | $b_{xv}$ | MAE <sup>a</sup> / $\text{dm}^3$<br>$\text{mol}^{-1}$ |
| 0.0000  | 0.1868                                    | 1.1206   | 2.14E-05                                              | 0.1858                                    | 1.1207   | 2.45E-05                                              |
| 0.0588  | 0.1987                                    | 1.1045   | 3.47E-05                                              | 0.1977                                    | 1.1042   | 3.47E-05                                              |
| 0.1232  | 0.2115                                    | 1.0878   | 6.57E-05                                              | 0.2105                                    | 1.0871   | 6.33E-05                                              |
| 0.1942  | 0.2258                                    | 1.0728   | 9.97E-05                                              | 0.2246                                    | 1.0714   | 9.64E-05                                              |
| 0.2726  | 0.2421                                    | 1.0615   | 1.44E-04                                              | 0.2409                                    | 1.0595   | 1.42E-04                                              |
| 0.3599  | 0.2602                                    | 1.0531   | 1.76E-04                                              | 0.2595                                    | 1.0505   | 1.77E-04                                              |
| 0.4575  | 0.2822                                    | 1.0481   | 2.24E-04                                              | 0.2801                                    | 1.0456   | 2.27E-04                                              |
| 0.5675  | 0.3070                                    | 1.0465   | 2.67E-04                                              | 0.3018                                    | 1.0435   | 2.75E-04                                              |
| 0.6922  | 0.3345                                    | 1.0479   | 3.24E-04                                              | 0.3288                                    | 1.0446   | 3.42E-04                                              |
| 0.8350  | 0.3670                                    | 1.0520   | 3.83E-04                                              | 0.3538                                    | 1.0487   | 4.16E-04                                              |
| 0.9175  | 0.3876                                    | 1.0542   | 4.38E-04                                              | 0.3760                                    | 1.0540   | 4.77E-04                                              |
| 1.0000  | 0.4102                                    | 1.0583   | 5.30E-04                                              | 0.3962                                    | 1.0605   | 5.42E-04                                              |

<sup>a</sup> Mean absolute error between calculated and experimental isobars

**Table S2** The  $a_{mf}$  -  $b_{xv}$  parameter pairs for the methanol – water binary mixture with cubic  $c8$  clusters excluded from the cluster set.

| x(MeOH) | B3LYP-D3                                  |          |                                                       | M06-2X                                    |          |                                                       |
|---------|-------------------------------------------|----------|-------------------------------------------------------|-------------------------------------------|----------|-------------------------------------------------------|
|         | $a_{mf}/$<br>$\text{Jm}^3\text{mol}^{-1}$ | $b_{xv}$ | MAE <sup>a</sup> / $\text{dm}^3$<br>$\text{mol}^{-1}$ | $a_{mf}/$<br>$\text{Jm}^3\text{mol}^{-1}$ | $b_{xv}$ | MAE <sup>a</sup> / $\text{dm}^3$<br>$\text{mol}^{-1}$ |
| 0.0000  | 0.1870                                    | 1.1216   | 1.32E-05                                              | 0.1860                                    | 1.1220   | 1.40E-05                                              |
| 0.0588  | 0.1989                                    | 1.1051   | 1.86E-05                                              | 0.1978                                    | 1.1049   | 2.45E-05                                              |
| 0.1232  | 0.2116                                    | 1.0881   | 4.60E-05                                              | 0.2105                                    | 1.0874   | 1.93E-05                                              |
| 0.1942  | 0.2258                                    | 1.0726   | 7.81E-05                                              | 0.2246                                    | 1.0714   | 7.94E-05                                              |
| 0.2726  | 0.2412                                    | 1.0604   | 1.22E-04                                              | 0.2400                                    | 1.0592   | 1.25E-04                                              |
| 0.3599  | 0.2607                                    | 1.0518   | 1.54E-04                                              | 0.2583                                    | 1.0494   | 1.61E-04                                              |
| 0.4575  | 0.2819                                    | 1.0470   | 2.01E-04                                              | 0.2799                                    | 1.0443   | 2.13E-04                                              |
| 0.5675  | 0.3069                                    | 1.0453   | 2.46E-04                                              | 0.3035                                    | 1.0427   | 2.66E-04                                              |
| 0.6922  | 0.3354                                    | 1.0472   | 3.05E-04                                              | 0.3296                                    | 1.0439   | 3.37E-04                                              |
| 0.8350  | 0.3690                                    | 1.0529   | 3.71E-04                                              | 0.3572                                    | 1.0486   | 4.19E-04                                              |
| 0.9175  | 0.3878                                    | 1.0563   | 4.30E-04                                              | 0.3744                                    | 1.0540   | 4.81E-04                                              |
| 1.0000  | 0.4102                                    | 1.0583   | 5.30E-04                                              | 0.3962                                    | 1.0605   | 5.42E-04                                              |

<sup>a</sup> Mean absolute error between calculated and experimental isobars

**Table S3** Gibbs free energy of interaction per hydrogen bond and cluster populations at T = 298K for x(MeOH) = 0.0 (neat water), 0.36, and 1.0 (neat MeOH), computed with B3LYP-D3.

| Name of cluster | $\Delta G^{298} /$<br>H-bond | Populations (%) |             |          |
|-----------------|------------------------------|-----------------|-------------|----------|
|                 |                              | at x=0.0        | at x=0.3599 | at x=1.0 |
| <i>m1</i>       | 0.00                         | 0.00            | 0.01        | 0.04     |
| <i>w1</i>       | 0.00                         | 0.03            | 0.02        | 0.00     |
| <i>m2</i>       | 16.89                        | 0.00            | 0.00        | 0.00     |
| <i>m1w1</i>     | 12.06                        | 0.00            | 0.00        | 0.00     |
| <i>w1m1</i>     | 11.67                        | 0.00            | 0.00        | 0.00     |
| <i>w2</i>       | 11.06                        | 0.01            | 0.00        | 0.00     |
| <i>m3r</i>      | 6.57                         | 0.00            | 0.00        | 0.01     |
| <i>m2w1r</i>    | 5.49                         | 0.00            | 0.00        | 0.00     |
| <i>m1w2r</i>    | 5.76                         | 0.00            | 0.00        | 0.00     |
| <i>w3r</i>      | 5.99                         | 0.01            | 0.00        | 0.00     |
| <i>m4r</i>      | 4.49                         | 0.00            | 0.07        | 1.21     |
| <i>m3w1r</i>    | 3.33                         | 0.00            | 0.14        | 0.00     |
| <i>m2w2r</i>    | 4.20                         | 0.00            | 0.07        | 0.00     |
| <i>m1w3r</i>    | 2.82                         | 0.00            | 0.17        | 0.00     |
| <i>w4r</i>      | 3.68                         | 0.35            | 0.09        | 0.00     |
| <i>m5r</i>      | 4.30                         | 0.00            | 1.59        | 46.06    |
| <i>m4w1r</i>    | 3.85                         | 0.00            | 1.17        | 0.00     |
| <i>m3w2r</i>    | 4.25                         | 0.00            | 0.89        | 0.00     |
| <i>m2w3r</i>    | 4.51                         | 0.00            | 0.79        | 0.00     |
| <i>m1w4r</i>    | 4.58                         | 0.00            | 0.94        | 0.00     |
| <i>w5r</i>      | 4.15                         | 3.83            | 0.63        | 0.00     |
| <i>m6r</i>      | 5.99                         | 0.00            | 1.04        | 50.24    |
| <i>m5w1r</i>    | 5.92                         | 0.00            | 3.42        | 0.00     |
| <i>m4w2r</i>    | 5.55                         | 0.00            | 1.89        | 0.00     |
| <i>m3w3r</i>    | 5.10                         | 0.00            | 1.36        | 0.00     |
| <i>m2w4r</i>    | 5.46                         | 0.00            | 0.81        | 0.00     |
| <i>m1w5r</i>    | 4.96                         | 0.00            | 0.52        | 0.00     |
| <i>w6r</i>      | 5.07                         | 5.59            | 0.59        | 0.00     |
| <i>m7r</i>      | 6.09                         | 0.00            | 0.03        | 2.43     |
| <i>m6w1r</i>    | 5.80                         | 0.00            | 0.02        | 0.00     |
| <i>m5w2r</i>    | 6.14                         | 0.00            | 0.01        | 0.00     |
| <i>m4w3r</i>    | 5.79                         | 0.00            | 0.01        | 0.00     |
| <i>m3w4r</i>    | 6.07                         | 0.00            | 0.00        | 0.00     |
| <i>m2w5r</i>    | 6.54                         | 0.00            | 0.02        | 0.00     |
| <i>m1w6r</i>    | 5.33                         | 0.00            | 0.07        | 0.00     |
| <i>w7r</i>      | 7.06                         | 3.52            | 0.24        | 0.00     |

|                       |      |       |      |      |
|-----------------------|------|-------|------|------|
| <i>m6w1bc</i>         | 5.30 | 0.00  | 0.01 | 0.00 |
| <i>m5w2bc</i>         | 4.73 | 0.00  | 0.01 | 0.00 |
| <i>m4w3bc</i>         | 4.68 | 0.00  | 0.00 | 0.00 |
| <i>m3w4bc</i>         | 5.18 | 0.00  | 0.01 | 0.00 |
| <i>m2w5bc</i>         | 4.38 | 0.00  | 0.03 | 0.00 |
| <i>m1w6bc</i>         | 4.07 | 0.00  | 0.03 | 0.00 |
| <i>w7bc</i>           | 3.81 | 0.31  | 0.02 | 0.00 |
| <i>m4w1s</i>          | 8.68 | 0.00  | 0.00 | 0.00 |
| <i>m3w2s</i>          | 8.65 | 0.00  | 0.00 | 0.00 |
| <i>m2w3s</i>          | 7.99 | 0.00  | 0.00 | 0.00 |
| <i>m1w4s</i>          | 7.13 | 0.00  | 0.00 | 0.00 |
| <i>w5s</i>            | 7.09 | 0.00  | 0.00 | 0.00 |
| <i>m5w1s</i>          | 6.93 | 0.00  | 0.01 | 0.00 |
| <i>m4w2s</i>          | 6.96 | 0.00  | 0.01 | 0.00 |
| <i>m3w3s</i>          | 5.93 | 0.00  | 0.00 | 0.00 |
| <i>m2w4s</i>          | 5.88 | 0.00  | 0.00 | 0.00 |
| <i>m1w5s</i>          | 6.11 | 0.00  | 0.00 | 0.00 |
| <i>w6s</i>            | 6.22 | 0.03  | 0.00 | 0.00 |
| <i>m8w1s</i>          | 5.54 | 0.00  | 0.04 | 0.00 |
| <i>m7w2s</i>          | 5.73 | 0.00  | 0.05 | 0.00 |
| <i>m6w3s</i>          | 5.92 | 0.00  | 1.29 | 0.00 |
| <i>m5w4s</i>          | 6.19 | 0.00  | 0.52 | 0.00 |
| <i>m4w5s</i>          | 6.05 | 0.00  | 0.14 | 0.00 |
| <i>m3w6s</i>          | 6.07 | 0.00  | 1.31 | 0.00 |
| <i>m2w7s</i>          | 5.75 | 0.00  | 0.36 | 0.00 |
| <i>m1w8s</i>          | 5.38 | 0.00  | 0.34 | 0.00 |
| <i>w9s</i>            | 5.49 | 11.93 | 0.34 | 0.00 |
| <i>m10w1s</i>         | 6.08 | 0.00  | 0.12 | 0.00 |
| <i>m9w2s</i>          | 7.55 | 0.00  | 0.31 | 0.00 |
| <i>m8w3s</i>          | 7.81 | 0.00  | 0.14 | 0.00 |
| <i>m7w4s</i>          | 7.57 | 0.00  | 0.09 | 0.00 |
| <i>m6w5s</i>          | 7.32 | 0.00  | 0.18 | 0.00 |
| <i>m5w6s</i>          | 7.40 | 0.00  | 0.13 | 0.00 |
| <i>m4w7s</i>          | 7.56 | 0.00  | 0.65 | 0.00 |
| <i>m3w8s</i>          | 7.18 | 0.00  | 0.24 | 0.00 |
| <i>m2w9s</i>          | 6.35 | 0.00  | 0.26 | 0.00 |
| <i>m1w10s</i>         | 6.10 | 0.00  | 0.15 | 0.00 |
| <i>w11s</i>           | 6.23 | 5.38  | 0.06 | 0.00 |
| <i>m3w1r-m1</i>       | 6.78 | 0.00  | 0.00 | 0.00 |
| <i>m5r-w1</i>         | 6.88 | 0.00  | 0.00 | 0.00 |
| <i>m3w1r-2m1(1,1)</i> | 9.44 | 0.00  | 0.00 | 0.00 |

|                       |       |       |       |      |
|-----------------------|-------|-------|-------|------|
| <i>m3w1r-2m1(1,3)</i> | 10.12 | 0.00  | 0.00  | 0.00 |
| <i>m2·mw·m2</i>       | 3.98  | 0.00  | 0.10  | 0.00 |
| <i>mw·mw·m2</i>       | 4.79  | 0.00  | 0.17  | 0.00 |
| <i>mw·mw·mw</i>       | 4.38  | 0.00  | 0.09  | 0.00 |
| <i>w2·mw·mw</i>       | 3.76  | 0.00  | 0.13  | 0.00 |
| <i>mw·w2·mw</i>       | 4.78  | 0.00  | 0.05  | 0.00 |
| <i>w2·mw·w2</i>       | 3.99  | 0.00  | 0.12  | 0.00 |
| <i>w2·w2·w2</i>       | 4.43  | 0.65  | 0.07  | 0.00 |
| <i>mw·w2·w2</i>       | 4.32  | 0.00  | 0.06  | 0.00 |
| <i>m2·w2·mw</i>       | 5.21  | 0.00  | 0.26  | 0.00 |
| <i>m2·w2·m2</i>       | 4.45  | 0.00  | 0.05  | 0.00 |
| <i>m5w3c</i>          | 2.19  | 0.00  | 1.72  | 0.00 |
| <i>m4w4c</i>          | 1.43  | 0.00  | 9.19  | 0.00 |
| <i>m3w5c</i>          | 1.33  | 0.00  | 30.46 | 0.00 |
| <i>m2w6c</i>          | 1.68  | 0.00  | 11.84 | 0.00 |
| <i>m1w7c</i>          | 1.73  | 0.00  | 19.11 | 0.00 |
| <i>w8c</i>            | 2.26  | 68.37 | 3.03  | 0.00 |
| <i>m4w4c-m1</i>       | 2.96  | 0.00  | 0.05  | 0.00 |

**Figure S1** Number of clusters corresponding to a specific molar fraction  $x(\text{MeOH})$ .

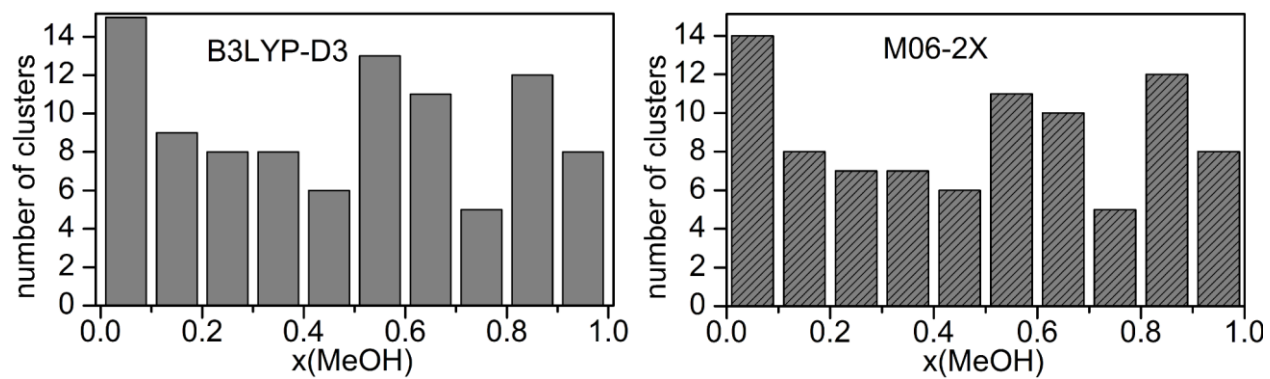

**Figure S2** Comparison of B3LYP-D3/QZVP//TZVP and M06-2X/aug-cc-pVTZ interaction energies with MP2(fc)-CP/6-311++G(d,p) results<sup>37</sup> for the methanol ring clusters.

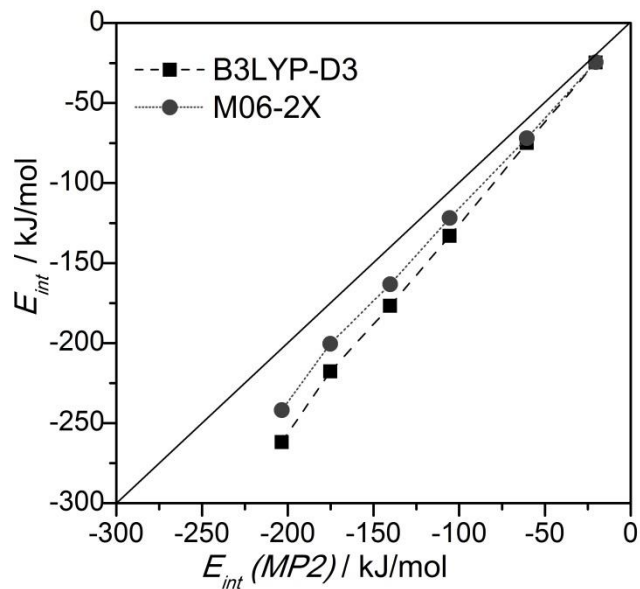

**Figure S3** Comparison of B3LYP-D3/QZVP//TZVP with M06-2X/aug-cc-pVTZ interaction energies.

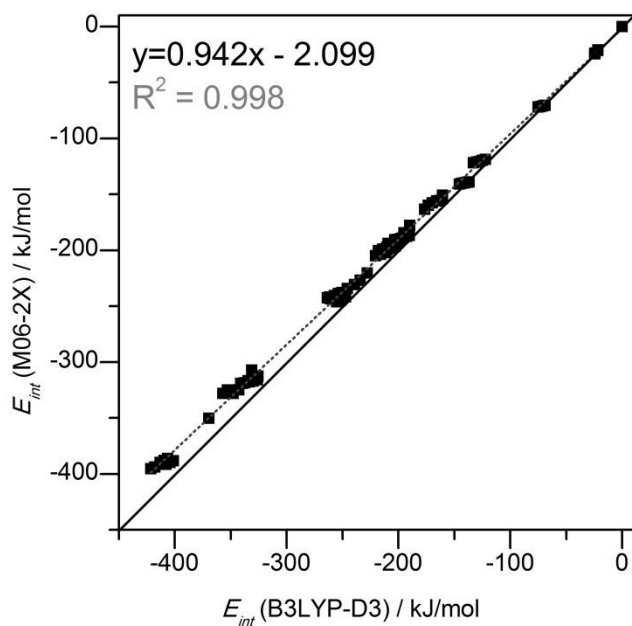



**Figure S4** Population (%) of ■...pure methanol clusters, ●...pure water cluster, ▲...mixed MeOH–water clusters at 298 K based on M06-2X calculations.

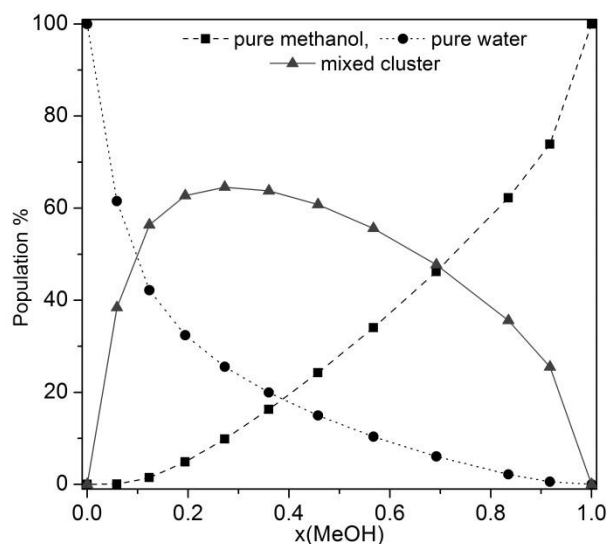

**Figure S5** Plot of individual cluster distributions including *c8* cubic clusters (for clarity, only clusters > 10% are shown) at 298K based on M06-2X calculations.

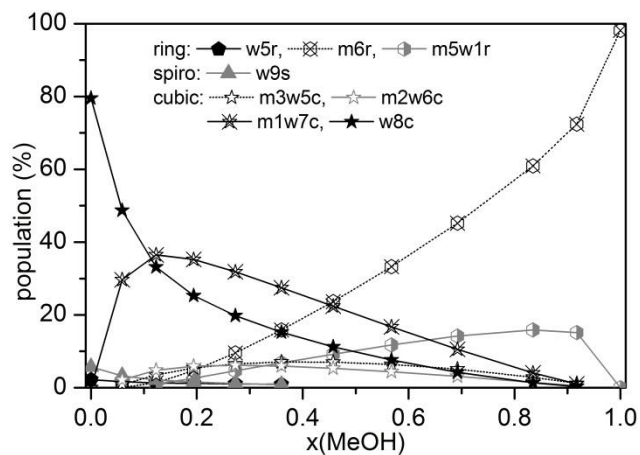

**Figure S6** Comparison of experimental and calculated excess enthalpies  $H^E$ , entropies  $S^E$ , and Gibbs free energies  $G^E$  of mixing, based on M06-2X calculations, for the full cluster set as well as the cluster set without the cubic  $c8$  clusters at different molar ratios.<sup>a</sup>

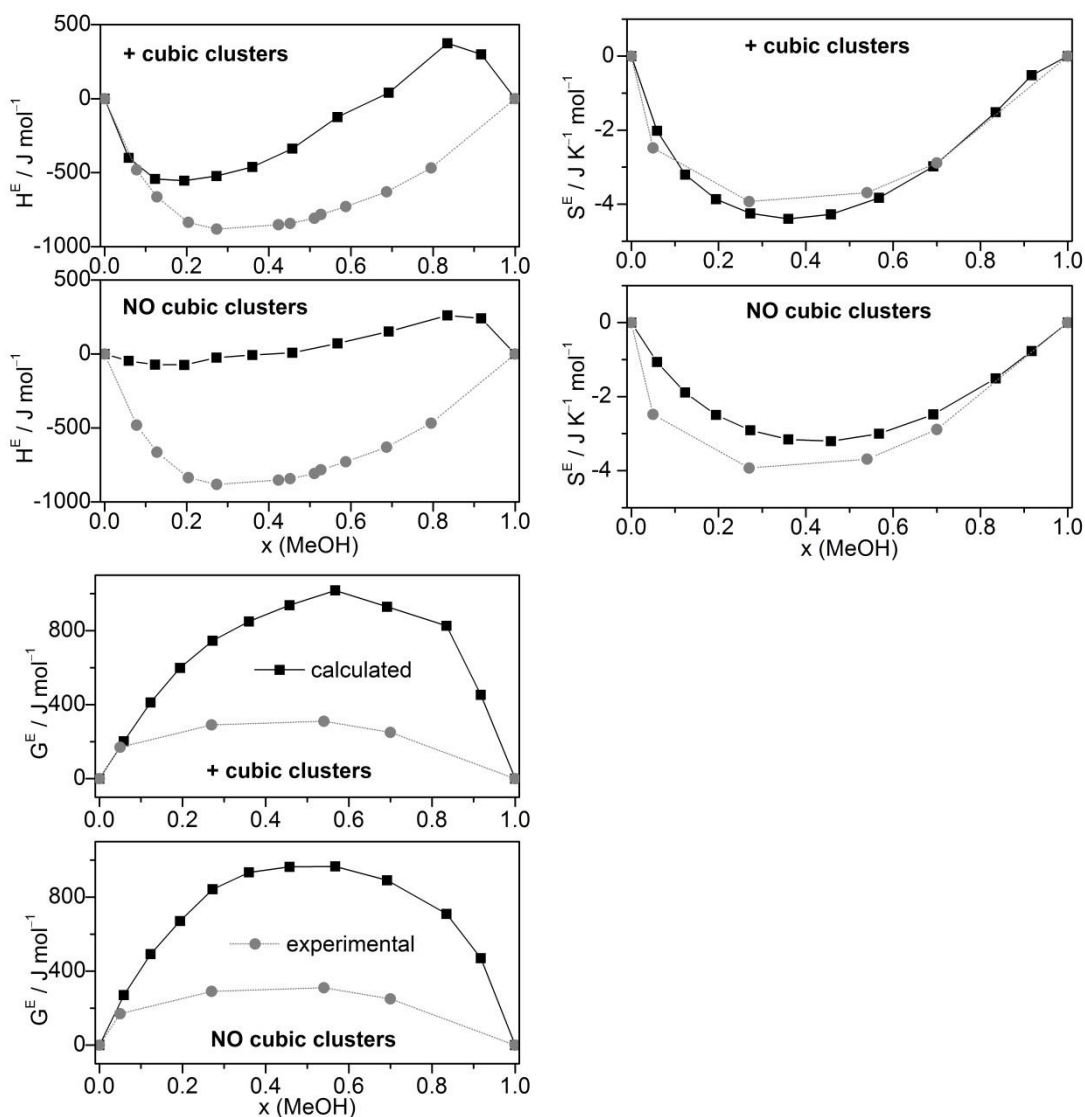

<sup>a</sup>experimental values for  $H^E$  are taken from refs. <sup>89-90</sup>, those for  $S^E$  and  $G^E$  from ref. <sup>56</sup>.

**Figure S7** Comparison of experimental<sup>92-93</sup> and B3LYP-D3 calculated excess heat capacities of mixing  $C_p^E$  at  $T = 298.15\text{K}$ .

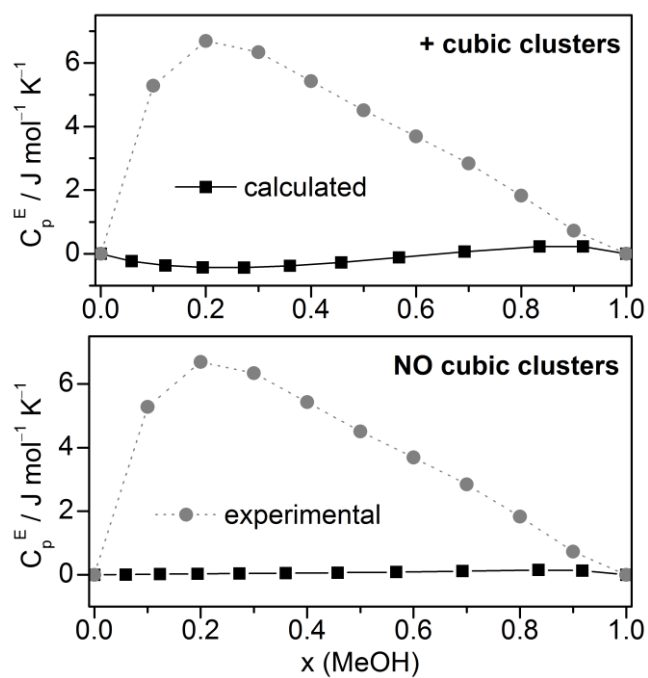

**Figure S8** Comparison of M06-2X calculated and experimental heat capacities  $C_p$ <sup>67, 92-93</sup> and excess heat capacities of mixing  $C_p^E$ <sup>92-93</sup> at T = 298.15K.

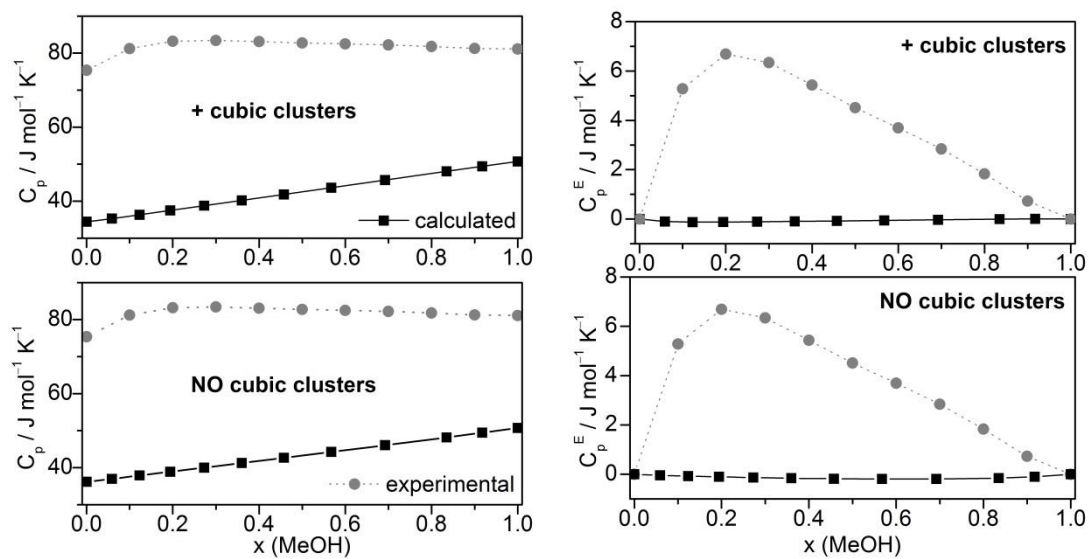

Supplement: c4cp05836d2.pdf [file c4cp05836d2.pdf]
